# Supplementary material
Source: HighWire-hosted journal article supplement (https://bjo.bmj.com/content/suppl/2006/06/27/89.11.1403)
Supplement: 89111403corrected_fig.pdf [file 89111403corrected_fig.pdf]

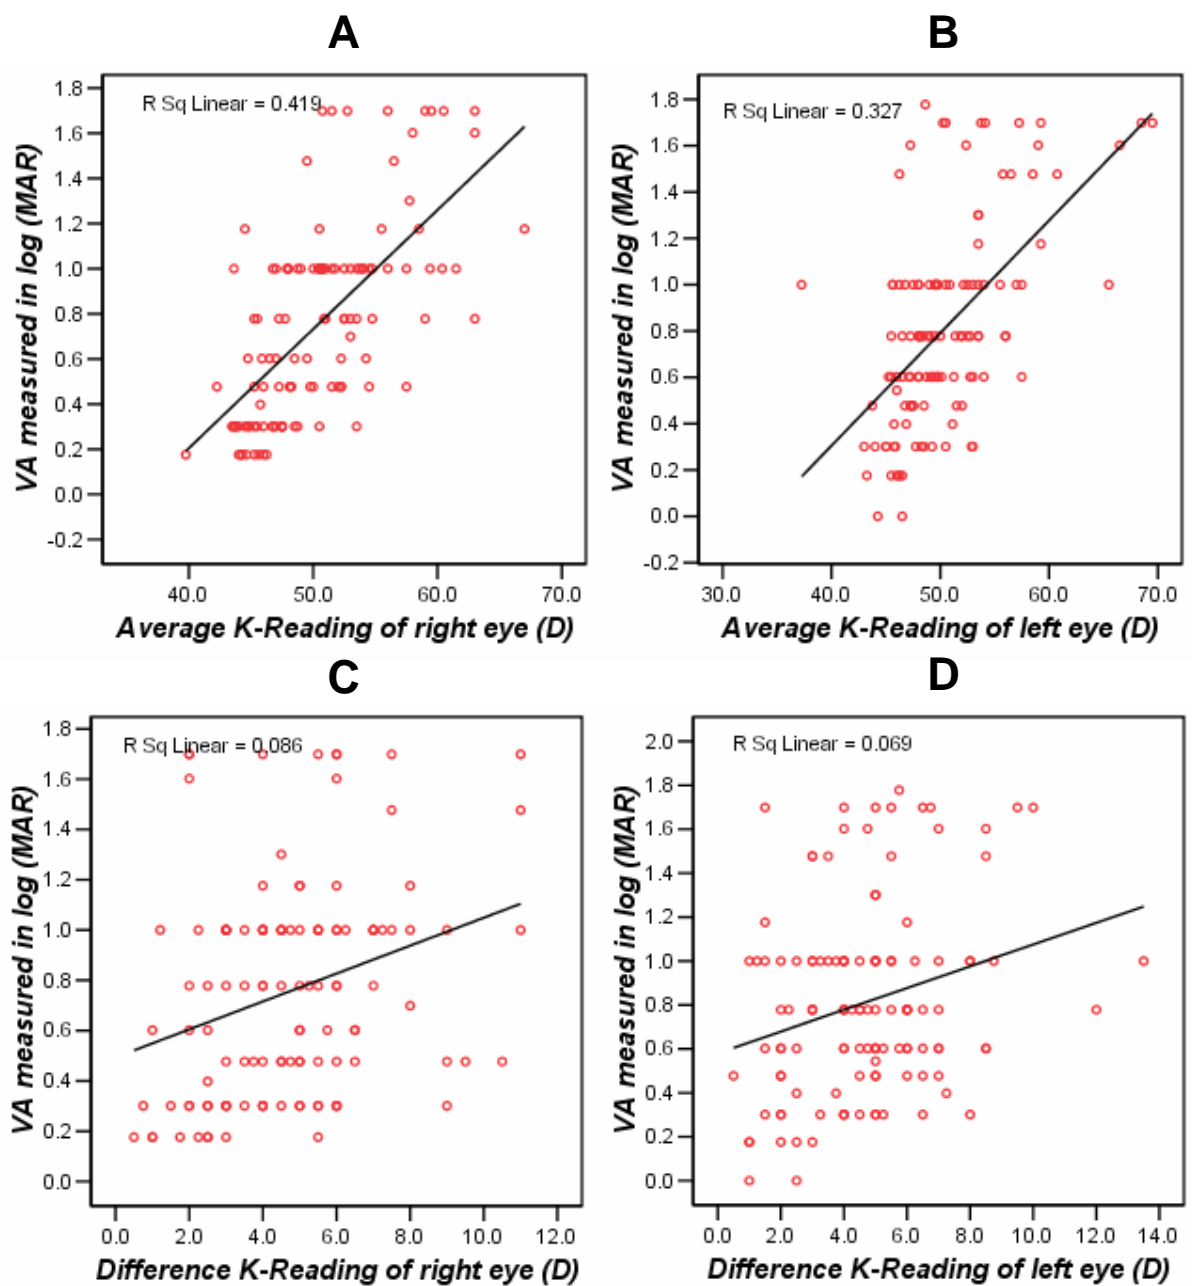

**Figure:** Scatter plot illustrating visual acuity against keratometry measurements. (A,B) Visual acuity decreases with increasing corneal curvature. (C,D) Visual acuity decreases with increasing corneal astigmatism, although only with a weak relation.
